# Supplementary material for: White Wine Antioxidant Metabolome: Definition and Dynamic Behavior during Aging on Lees in Oak Barrels
Source: MDPI journal article supplement (doi:10.3390/antiox12020395), 2023-02-06
Supplement: s1 [file s1]

# White wines antioxidant metabolome: Definition and dynamic behavior during aging on lees in oak barrel aging

Rémy ROMANET, Régis D. GOUGEON and Maria NIKOLANTONAKI\*

Université de Bourgogne, Institut Agro Dijon, PAM UMR A 02.102, Institut Universitaire de la Vigne et du Vin – Jules Guyot, F-21000 Dijon, France

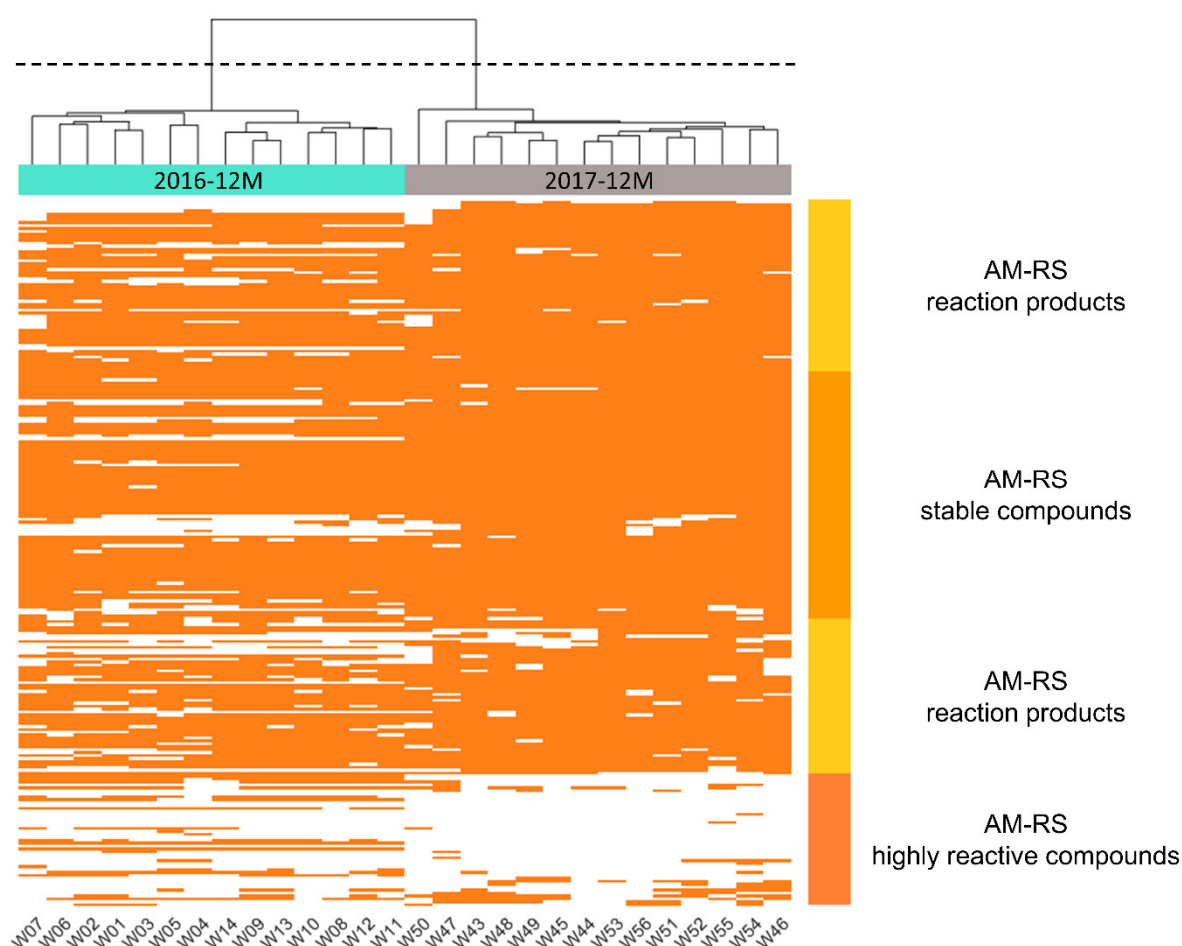

**Figure S1.** Heatmap of AM-RS comparing wines from vintage 2016 and 2017 after 12 month of barrel aging. White areas represent undetected compounds, orange areas represent detected compounds. Discrimination of three groups of AM-RS compounds: stable compounds, highly reactive compounds and reaction products is based on Hierarchical clustering analysis obtained for AM-RS dynamic behavior of 2017 vintage (Figure 3).
